# Supplementary material for: Lessons learned from using linked administrative data to evaluate the Family Nurse Partnership in England and Scotland
Source: PubMed Central journal article supplement — Int J Popul Data Sci. 2023 May 11;8(1):2113. doi: 10.23889/ijpds.v8i1.2113 (PMC10476150; doi:10.23889/ijpds.v8i1.2113), 2023-05-11

Appendix Table 1: Comparison of characteristics of mothers enrolled in FNP, not enrolled in FNP but living in local authority with active FNP site at the time of pregnancy, and living in local authority where FNP never commissioned – England, births between April 2010–March 2017

|                                                                                        | Mothers enrolled in FNP |       | Mothers not enrolled in FNP, living in LA with active FNP site (Controls) |       | Mothers in LAs where FNP never commissioned |       |
|----------------------------------------------------------------------------------------|-------------------------|-------|---------------------------------------------------------------------------|-------|---------------------------------------------|-------|
|                                                                                        | N                       | %     | N                                                                         | %     | N                                           | %     |
| <b>Total</b>                                                                           | 31,260                  | 100.0 | 99,150                                                                    | 100.0 | 100,455                                     | 100.0 |
| <b>Maternal age (years)</b>                                                            |                         |       |                                                                           |       |                                             |       |
| 13-15                                                                                  | 1,450                   | 4.6   | 1,235                                                                     | 1.2   | 2,160                                       | 2.2   |
| 16-17                                                                                  | 10,370                  | 33.2  | 15,690                                                                    | 15.8  | 20,040                                      | 19.9  |
| 18-19                                                                                  | 15,805                  | 50.6  | 56,660                                                                    | 57.1  | 56,310                                      | 56.1  |
| 20-21                                                                                  | 3,635                   | 11.6  | 25,565                                                                    | 25.8  | 21,945                                      | 21.8  |
| <b>Ethnicity</b>                                                                       |                         |       |                                                                           |       |                                             |       |
| White                                                                                  | 26,330                  | 84.2  | 83,485                                                                    | 84.2  | 88,895                                      | 88.5  |
| South Asian                                                                            | 670                     | 2.1   | 3,030                                                                     | 3.1   | 2,325                                       | 2.3   |
| Black                                                                                  | 1,470                   | 4.7   | 3,180                                                                     | 3.2   | 2,705                                       | 2.7   |
| Mixed/other                                                                            | 1,685                   | 5.4   | 5,155                                                                     | 5.2   | 3,905                                       | 3.9   |
| Unknown                                                                                | 1,110                   | 3.5   | 4,300                                                                     | 4.3   | 2,620                                       | 2.6   |
| <b>Area-level deprivation</b>                                                          |                         |       |                                                                           |       |                                             |       |
| Least deprived                                                                         | 1,445                   | 4.6   | 5,360                                                                     | 5.4   | 8,460                                       | 8.4   |
| 2                                                                                      | 2,305                   | 7.4   | 8,105                                                                     | 8.2   | 12,825                                      | 12.8  |
| 3                                                                                      | 4,115                   | 13.2  | 13,735                                                                    | 13.9  | 18,065                                      | 18.0  |
| 4                                                                                      | 7,890                   | 25.2  | 24,660                                                                    | 24.9  | 25,630                                      | 25.5  |
| Most deprived                                                                          | 15,340                  | 49.1  | 47,290                                                                    | 47.7  | 34,890                                      | 34.7  |
| <b>History of admissions with diagnoses within 2 years prior to 20 weeks gestation</b> |                         |       |                                                                           |       |                                             |       |
| Mental health (any)                                                                    | 2,690                   | 8.6   | 3,860                                                                     | 3.9   | 3,910                                       | 3.9   |
| Chronic condition (any, exc. mental health)                                            | 4,125                   | 13.2  | 7,805                                                                     | 7.9   | 8,105                                       | 8.1   |
| A&E visits                                                                             | 21,985                  | 70.3  | 60,335                                                                    | 60.8  | 61,255                                      | 61.0  |
| <b>Gestational age at antenatal booking appointment</b>                                |                         |       |                                                                           |       |                                             |       |
| Before 10 weeks                                                                        | 8,390                   | 26.8  | 26,890                                                                    | 27.1  | 25,840                                      | 25.7  |
| 10-20 weeks                                                                            | 11,530                  | 36.9  | 36,455                                                                    | 36.8  | 36,325                                      | 36.2  |
| 20 weeks or more                                                                       | 1,925                   | 6.2   | 5,395                                                                     | 5.4   | 10,180                                      | 10.1  |
| Unknown                                                                                | 9,420                   | 30.1  | 30,415                                                                    | 30.7  | 28,105                                      | 28.0  |
| <b>Exclusions and absences</b>                                                         |                         |       |                                                                           |       |                                             |       |
| Ever excluded, in pupil referral unit or alternative provision                         | 10,560                  | 33.8  | 22,390                                                                    | 22.6  | 24,485                                      | 24.4  |
| Ever recorded as persistently absent in a term                                         | 15,090                  | 48.3  | 25,510                                                                    | 25.7  | 32,275                                      | 32.1  |
| <b>Social care characteristics before 20 weeks of pregnancy</b>                        |                         |       |                                                                           |       |                                             |       |
| Ever in care                                                                           | 3,235                   | 10.3  | 3,720                                                                     | 3.8   | 4,690                                       | 4.7   |
| Ever had recorded child protection plan                                                | 1,990                   | 6.4   | 1,895                                                                     | 1.9   | 14,970                                      | 14.9  |
| <b>Education variables</b>                                                             |                         |       |                                                                           |       |                                             |       |
| <b>Total</b>                                                                           | 31,260                  | 100.0 | 99,150                                                                    | 100.0 | 100,455                                     | 100.0 |
| Ever recorded as having special educational needs                                      | 17,150                  | 54.9  | 39,325                                                                    | 39.7  | 36,645                                      | 36.5  |
| Ever recorded as having free school meals                                              | 18,525                  | 59.3  | 42,795                                                                    | 43.2  | 36,820                                      | 36.7  |
| Ever in bottom IDACI decile                                                            | 11,565                  | 37.0  | 27,525                                                                    | 27.8  | 19,280                                      | 19.2  |

\*in those who were 20 weeks of gestation before Y11. FNP – Family Nurse Partnership; LA – local authority.

Appendix Table 2: Comparison of characteristics of mothers enrolled in FNP, controls (mothers pregnant at a time when FNP not enrolling mothers), and mothers offered FNP but declined or not offered FNP – Scotland, mothers-to-be eligible for FNP between 1 January 2009 and 31 March 2016

|                                                                      | Mothers enrolled in FNP |              | Mothers not enrolled in FNP, living in HB with outside period of recruitment (Controls) |              | Mothers offered but not enrolled in FNP, or not offered FNP within period of enrolment |              |
|----------------------------------------------------------------------|-------------------------|--------------|-----------------------------------------------------------------------------------------|--------------|----------------------------------------------------------------------------------------|--------------|
|                                                                      | N                       | %            | N                                                                                       | %            | N                                                                                      | %            |
| <b>Total</b>                                                         | <b>3,205</b>            | <b>100.0</b> | <b>5,016</b>                                                                            | <b>100.0</b> | <b>2,214</b>                                                                           | <b>100.0</b> |
| <b>Maternal age at last menstrual period (years)</b>                 |                         |              |                                                                                         |              |                                                                                        |              |
| Mean (SD)                                                            | 18.30                   | 1.41         | 18.22                                                                                   | 1.23         | 18.4                                                                                   | 2.20         |
| <b>Ethnicity</b>                                                     |                         |              |                                                                                         |              |                                                                                        |              |
| White                                                                | 2,724                   | 87.6         | 3,573                                                                                   | 78.7         | 1,733                                                                                  | 82.8         |
| Other                                                                | 384                     | 12.4         | 969                                                                                     | 21.3         | 360                                                                                    | 17.2         |
| <b>Scottish Index of Multiple Deprivation Quintile</b>               |                         |              |                                                                                         |              |                                                                                        |              |
| Most deprived                                                        | 1,532                   | 47.9         | 2,478                                                                                   | 49.4         | 992                                                                                    | 44.9         |
| 2                                                                    | 821                     | 25.7         | 1,221                                                                                   | 24.3         | 588                                                                                    | 26.6         |
| 3                                                                    | 441                     | 13.8         | 643                                                                                     | 12.8         | 316                                                                                    | 14.3         |
| 4                                                                    | 264                     | 8.3          | 459                                                                                     | 9.2          | 214                                                                                    | 9.7          |
| Least deprived                                                       | 140                     | 4.4          | 215                                                                                     | 4.3          | 101                                                                                    | 4.6          |
| <b>Body mass index (BMI) (kg/m<sup>2</sup>) at antenatal booking</b> |                         |              |                                                                                         |              |                                                                                        |              |
| Mean (SD)                                                            | 23.94                   | 5.0          | 24.3                                                                                    | 5.1          | 24.4                                                                                   | 5.1          |
| <b>Smoking history at antenatal booking</b>                          |                         |              |                                                                                         |              |                                                                                        |              |
| Never smoked                                                         | 1,254                   | 39.9         | 2,212                                                                                   | 46.4         | 1,048                                                                                  | 49.2         |
| Former smoker                                                        | 602                     | 19.2         | 788                                                                                     | 16.5         | 341                                                                                    | 16.0         |
| Current smoker                                                       | 1,285                   | 40.9         | 1,767                                                                                   | 37.1         | 739                                                                                    | 34.7         |
| <b>Drug misuse at any time during current pregnancy</b>              |                         |              |                                                                                         |              |                                                                                        |              |
| No                                                                   | 2,788                   | 94.7         | 3,768                                                                                   | 96.8         | 1,866                                                                                  | 96.9         |
| Yes                                                                  | 156                     | 5.3          | 123                                                                                     | 3.2          | 59                                                                                     | 3.1          |
| <b>Previous pregnancy</b>                                            |                         |              |                                                                                         |              |                                                                                        |              |
| No                                                                   | 2,350                   | 74.0         | 3,716                                                                                   | 74.1         | 1,656                                                                                  | 74.9         |
| Yes                                                                  | 827                     | 26.0         | 1,296                                                                                   | 25.9         | 555                                                                                    | 25.1         |

FNP – Family Nurse Partnership.

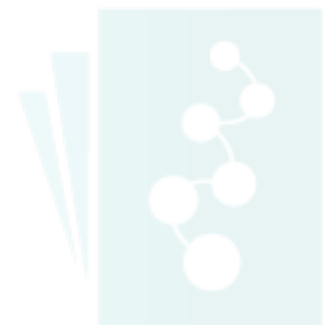

Appendix Table 3: Characteristics of mothers enrolled in FNP who did and did not link to HES in England

|                                              | Total FNP mothers |       | Linked mothers |      | Unlinked mothers |      |
|----------------------------------------------|-------------------|-------|----------------|------|------------------|------|
|                                              | N                 | %     | N              | %    | N                | %    |
| N (row %)                                    | 32,040            | 100.0 | 31,560         | 98.5 | 480              | 1.5  |
| Year of birth of child                       |                   |       |                |      |                  |      |
| 2010                                         | 2,085             | 6.5   | 2,055          | 6.5  | 25               | 5.6  |
| 2011                                         | 1,925             | 6.0   | 1,870          | 5.9  | 55               | 11.0 |
| 2012                                         | 2,925             | 9.1   | 2,870          | 9.1  | 60               | 12.1 |
| 2013                                         | 4,130             | 12.9  | 4,075          | 12.9 | 50               | 10.8 |
| 2014                                         | 3,640             | 11.4  | 3,600          | 11.4 | 40               | 8.5  |
| 2015                                         | 5,180             | 16.2  | 5,115          | 16.2 | 65               | 13.5 |
| 2016                                         | 5,360             | 16.7  | 5,275          | 16.7 | 85               | 17.7 |
| 2017                                         | 3,275             | 10.2  | 3,225          | 10.2 | 50               | 10.8 |
| 2018                                         | 2,815             | 8.8   | 2,785          | 8.8  | 30               | 6.7  |
| 2019                                         | 710               | 2.2   | 695            | 2.2  | 15               | 3.1  |
| Maternal age at birth                        |                   |       |                |      |                  |      |
| 13-15                                        | 265               | 0.8   | 260            | 0.8  | <8               | <1.7 |
| 16-17                                        | 11,705            | 36.5  | 11,525         | 36.5 | 180              | 37.1 |
| 18-19                                        | 15,960            | 49.8  | 15,735         | 49.9 | 225              | 46.9 |
| 20 and above                                 | 3,990             | 12.4  | 3,925          | 12.4 | 65               | 13.5 |
| Missing                                      | 120               | 0.4   | 115            | 0.4  | <8               | <1.7 |
| Ethnicity                                    |                   |       |                |      |                  |      |
| White                                        | 26,490            | 82.7  | 26,190         | 83.0 | 300              | 62.9 |
| Asian                                        | 755               | 2.4   | 730            | 2.3  | 25               | 4.8  |
| Black                                        | 1,640             | 5.1   | 1,585          | 5.0  | 55               | 11.7 |
| Mixed/other                                  | 2,195             | 6.9   | 2,145          | 6.8  | 50               | 10.4 |
| Missing                                      | 960               | 3.0   | 910            | 2.9  | 50               | 10.2 |
| Region                                       |                   |       |                |      |                  |      |
| East Midlands                                | 2,880             | 9.0   | 2,825          | 9.0  | 55               | 11.0 |
| East of England                              | 2,595             | 8.1   | 2,575          | 8.2  | 20               | 4.4  |
| London                                       | 5,030             | 15.7  | 4,870          | 15.4 | 160              | 32.9 |
| North East                                   | 2,185             | 6.8   | 2,170          | 6.9  | 15               | 3.3  |
| North West                                   | 5,130             | 16.0  | 5,060          | 16.0 | 70               | 15.0 |
| South East                                   | 4,605             | 14.4  | 4,550          | 14.4 | 55               | 11.0 |
| South West                                   | 1,860             | 5.8   | 1,840          | 5.8  | 20               | 4.4  |
| West Midlands                                | 3,960             | 12.4  | 3,915          | 12.4 | 50               | 10.0 |
| Yorkshire and The Humber                     | 3,800             | 11.9  | 3,760          | 11.9 | 40               | 7.9  |
| Relationship status (enrolment)              |                   |       |                |      |                  |      |
| In a relationship with biological father     | 22,710            | 70.9  | 22,400         | 71.0 | 310              | 64.2 |
| In a relationship with other partner         | 1,005             | 3.1   | 990            | 3.1  | 10               | 2.5  |
| Single                                       | 7,370             | 23.0  | 7,255          | 23.0 | 110              | 23.1 |
| Missing                                      | 960               | 3.0   | 910            | 2.9  | 50               | 10.2 |
| Living arrangements (enrolment)              |                   |       |                |      |                  |      |
| Mother (with or without partner)             | 16,995            | 53.0  | 16,790         | 53.2 | 205              | 42.3 |
| Partner (with or without others, not mother) | 6,175             | 19.3  | 6,065          | 19.2 | 105              | 22.3 |
| Relatives/other adults                       | 3,130             | 9.8   | 3,095          | 9.8  | 35               | 7.7  |
| Alone                                        | 1,860             | 5.8   | 1,830          | 5.8  | 30               | 6.5  |
| Foster carers/group home/other               | 2,920             | 9.1   | 2,865          | 9.1  | 55               | 11.0 |
| Missing                                      | 960               | 3.0   | 910            | 2.9  | 50               | 10.2 |
| Has any GCSEs (enrolment)                    |                   |       |                |      |                  |      |
| No                                           | 10,270            | 32.1  | 10,120         | 32.1 | 150              | 31.5 |
| Yes                                          | 20,795            | 64.9  | 20,515         | 65.0 | 280              | 58.1 |
| Missing                                      | 975               | 3.0   | 925            | 2.9  | 50               | 10.4 |
| Care leaver (during pregnancy)               |                   |       |                |      |                  |      |
| No                                           | 30,140            | 94.1  | 29,720         | 94.2 | 420              | 87.3 |
| Yes                                          | 1,185             | 3.7   | 1,170          | 3.7  | 15               | 2.9  |
| Missing                                      | 715               | 2.2   | 670            | 2.1  | 45               | 9.8  |

Continued.

Appendix Table 3: Continued

|                                                                  | Total FNP mothers |      | Linked mothers |      | Unlinked mothers |      |
|------------------------------------------------------------------|-------------------|------|----------------|------|------------------|------|
|                                                                  | N                 | %    | N              | %    | N                | %    |
| CIN, CPP, or CLA (during pregnancy)                              |                   |      |                |      |                  |      |
| No                                                               | 26,510            | 82.7 | 26,145         | 82.8 | 365              | 76.0 |
| Yes                                                              | 4,815             | 15.0 | 4,745          | 15.0 | 70               | 14.2 |
| Missing                                                          | 715               | 2.2  | 670            | 2.1  | 45               | 9.8  |
| Drug and alcohol use during pregnancy (14 days before enrolment) |                   |      |                |      |                  |      |
| No                                                               | 29,165            | 91.0 | 28,770         | 91.2 | 395              | 82.3 |
| Yes                                                              | 1,535             | 4.8  | 1,510          | 4.8  | 25               | 4.8  |
| Missing                                                          | 1,345             | 4.2  | 1,280          | 4.1  | 60               | 12.9 |
| Timing of first antenatal appointment                            |                   |      |                |      |                  |      |
| Before 10 weeks                                                  | 19,255            | 60.1 | 19,000         | 60.2 | 250              | 52.3 |
| 10-20 weeks                                                      | 10,955            | 34.2 | 10,770         | 34.1 | 180              | 37.9 |
| 20 weeks or more                                                 | 1,045             | 3.3  | 1,030          | 3.3  | 15               | 2.7  |
| Missing                                                          | 790               | 2.5  | 755            | 2.4  | 35               | 7.1  |
| Foetal death                                                     |                   |      |                |      |                  |      |
| No                                                               | 31,900            | 99.6 | 31,455         | 99.7 | 445              | 92.9 |
| Yes                                                              | 120               | 0.4  | 90             | 0.3  | 35               | 7.1  |
| Infant death                                                     |                   |      |                |      |                  |      |
| No                                                               | 31,885            | 99.6 | 31,410         | 99.6 | 475              | 99.6 |
| Yes                                                              | 135               | 0.4  | 130            | 0.4  | <8               | <1.7 |
| Mean number of FNP visits                                        |                   | 34.9 |                | 35.0 |                  | 25.8 |

CIN – Child in Need status; CLA – Child Looked After; CPP – Child Protection Plan; FNP – Family Nurse Partnership.

Appendix Table 4: Timeline for linked FNP data access in England

|                       |                                                                                                                                                                         |
|-----------------------|-------------------------------------------------------------------------------------------------------------------------------------------------------------------------|
| October 2017          | Application submitted to DfE for NPD data                                                                                                                               |
| December 2017         | Application submitted to NHS Digital for linkage between FNP, HES and NPD                                                                                               |
| January 2018          | Application submitted to Confidentiality Advisory Group (CAG) / National Research Ethics                                                                                |
| February 2018         | Ethics approval confirmed                                                                                                                                               |
|                       | CAG provisional approval                                                                                                                                                |
|                       | Delays due to security assurances for DfE not being in place: NHS Digital could not release identifiers for linkage                                                     |
| November 2018         | Amendment submitted to NHS Digital removing request for DfE data (due to delays in security assurances being confirmed).                                                |
|                       | Amendment submitted to CAG to remove DfE data                                                                                                                           |
| January 2019          | CAG amendment approved                                                                                                                                                  |
|                       | New DARS application submitted                                                                                                                                          |
| June 2019             | DfE assurances now in place                                                                                                                                             |
|                       | Amendment submitted to CAG to allow linkage with education data (as per original CAG application)                                                                       |
| July 2019             | CAG approval for second amendment received                                                                                                                              |
|                       | We were advised by NHS Digital to wait until the first application (without education data) had been approved before we submitted an amendment (for the education data) |
| <b>September 2019</b> | <b>Grant started</b>                                                                                                                                                    |
| November 2019         | NHS Digital approval for linkage of HES and FNP data                                                                                                                    |
| July 2020             | Linked HES – FNP data received from NHS Digital                                                                                                                         |
| August 2020           | Amendment submitted to allow linkage with education data                                                                                                                |
| March 2021            | NHS Digital approval of linkage with education data                                                                                                                     |
| September 2021        | Linkage with education data completed                                                                                                                                   |
| October 2021          | Linked education and social care data available on the ONS SRS                                                                                                          |
| December 2021         | HES and FNP data imported into the ONS SRS                                                                                                                              |

Appendix Table 5: Timeline for linked FNP data access in Scotland

|                             |                                                                                                                                                                                                                                    |
|-----------------------------|------------------------------------------------------------------------------------------------------------------------------------------------------------------------------------------------------------------------------------|
| June 2016                   | Project start                                                                                                                                                                                                                      |
| October 2016                | Application submitted to Education Analytical Services (EAS)                                                                                                                                                                       |
| November 2016               | Application submitted to the Public Benefit and Privacy Panel (PBPP)<br>EAS application approved                                                                                                                                   |
| December 2016               | PBPP application approved with conditions (to set up additional data sharing/processing agreements and memoranda of understanding for each of the 10 Health Boards, and to create a new leaflet on data usage for new FNP clients) |
| February 2017               | Set up of data sharing/processing agreements and memoranda of understanding commenced                                                                                                                                              |
| May 2017                    | All data sharing/processing agreements and memoranda of understanding in place                                                                                                                                                     |
| June 2017                   | PBPP approval (conditions met)                                                                                                                                                                                                     |
| September 2017              | FNP data sent from FNP Scottish Information System (SIS) to the Electronic Data Research and Innovation Service (eDRIS)                                                                                                            |
| December 2017               | Amended data available in safe haven                                                                                                                                                                                               |
| January 2018                | Data query regarding cases flagging and SMR02 flow                                                                                                                                                                                 |
| February 2018               | Amendments submitted to EAS and PBPP regarding fields required                                                                                                                                                                     |
| May 2018                    | PBPP and EAS amendments approved                                                                                                                                                                                                   |
| August 2018                 | Outcomes list finalised                                                                                                                                                                                                            |
| December 2018               | Final controls identified, ready for outcomes to be linked                                                                                                                                                                         |
| January 2019- February 2020 | Delays in data provision                                                                                                                                                                                                           |
| March 2020                  | Partial outcome data made available                                                                                                                                                                                                |
| September 2020              | Partial outcome data made available                                                                                                                                                                                                |
| March 2021                  | Final datasets received                                                                                                                                                                                                            |

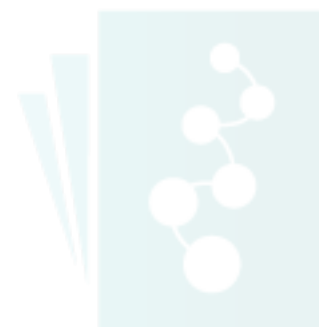

Supplement: ijpds-08-2113-s001.pdf [file ijpds-08-2113-s001.pdf]
